# Supplementary material for: Electrochemical conversion of CO2into HCOO−in a synergistic manner by a nanocomposite of Zn2SnO4/ZnO
Source: Royal Society of Chemistry journal article supplement (doi:10.1039/d2qi02762c), 2023-01-01
Supplement: d2qi02762c1.pdf [file d2qi02762c1.pdf]

## Supporting Information

### Electrochemical Converting CO<sub>2</sub> into HCOO<sup>-</sup> Synergistically by Nanocomposite of Zn<sub>2</sub>SnO<sub>4</sub>/ZnO

Yingzheng Zhang,<sup>a</sup> Zijian Li,<sup>b</sup> Haeseong Jang,<sup>c,d</sup> Xiaoqian Wei,<sup>a</sup> Qing Qin<sup>\*a</sup> and Xien  
Liu<sup>\*a</sup>

<sup>a</sup>College of Chemical Engineering, Qingdao University of Science and Technology, Qingdao  
266042, China.

<sup>b</sup>Department of Chemistry, City University of Hong Kong, Hong Kong, China

<sup>c</sup>Beamline Research Division, Pohang Accelerator Laboratory (PAL), Pohang 790-784 (Korea)

<sup>d</sup>Energy Storage and Distributed Resources Division Berkeley, Lawrence Berkeley National  
Laboratory, California 94720 (United States)

\* Corresponding authors

E-mail addresses: qinqing@qust.edu.cn (Q. Qin); liuxien@qust.edu.cn (X. Liu)

## List of contents

1. Chemicals
2. Materials characterization
3. CO<sub>2</sub>RR performance evaluation

**Fig. S1** Reaction pathways for HCOOH and CO products.

**Fig. S2** a) XRD patterns of ZnO and Zn<sub>2</sub>SnO<sub>4</sub>/ZnO, b) Magnified XRD patterns corresponding to the region in a) marked with yellow rectangle.

**Fig. S3** The TEM image of ZnO in Zn<sub>2</sub>SnO<sub>4</sub>/ZnO.

**Fig. S4** XRD pattern of prepared ZnO catalyst.

**Fig. S5** XRD pattern of prepared Zn<sub>2</sub>SnO<sub>4</sub> catalyst.

**Fig. S6** SEM image of ZnO.

**Fig. S7** Flow-cell schematic diagram.

**Fig. S8** LSV curves of a) Zn<sub>2</sub>SnO<sub>4</sub>/ZnO, b) Syn. ZnO, and c) Zn<sub>2</sub>SnO<sub>4</sub> measured at a scan rate of 10 mA cm<sup>-2</sup> in Ar- or CO<sub>2</sub>-saturated 0.5 M KHCO<sub>3</sub> solution.

**Fig. S9** Gas-chromatography of gas product produced by Zn<sub>2</sub>SnO<sub>4</sub>/ZnO for CO<sub>2</sub>RR at various potentials in 0.5 M KHCO<sub>3</sub> solution: a) FID, b) TCD.

**Fig. S10** <sup>1</sup>H NMR spectrum of liquid products acquired from Zn<sub>2</sub>SnO<sub>4</sub>/ZnO for CO<sub>2</sub>RR at -1.0 V vs RHE.

**Figure S11.** FEs of a) CO, b) H<sub>2</sub> for pristine ZnO, Zn<sub>2</sub>SnO<sub>4</sub> and Zn<sub>2</sub>SnO<sub>4</sub>/ZnO.

**Figure S12.** Partial current densities of H<sub>2</sub> and CO for Zn<sub>2</sub>SnO<sub>4</sub>/ZnO, Syn. ZnO, and Zn<sub>2</sub>SnO<sub>4</sub>.

**Figure S13.** Cyclic voltammograms recorded for a) Zn<sub>2</sub>SnO<sub>4</sub>/ZnO, b) Syn. ZnO, and

c)  $\text{Zn}_2\text{SnO}_4$  electrodes in the approximate region of 0.20 – 0.30 V vs. RHE at various scan rates.

**Figure S14.** The ECSA normalized specific current density of  $\text{Zn}_2\text{SnO}_4/\text{ZnO}$ , Syn.  $\text{ZnO}$ , and  $\text{Zn}_2\text{SnO}_4/\text{ZnO}$ .

**Figure S15.** ECSA normalized partial current density of a) CO b)  $\text{H}_2$  for  $\text{Zn}_2\text{SnO}_4/\text{ZnO}$ , Syn.  $\text{ZnO}$ , and  $\text{Zn}_2\text{SnO}_4$ .

## **Experimental section**

### **Chemicals**

SnCl<sub>2</sub> (MW: 189.62), CTAB (364.45), Nafion (5 wt%) and NaOH (AR:96%) were purchased from Sigma-Aldrich Co. Ltd. Sinopharm Chemical Reagent Co., Ltd. Zn(CH<sub>3</sub>COO)<sub>2</sub> (MW:183.48), Zn(NO<sub>3</sub>)<sub>2</sub>·6H<sub>2</sub>O (MW:297.48), SnCl<sub>4</sub>·5H<sub>2</sub>O (MW:350.6) and KHCO<sub>3</sub> (MW:100.12) were obtained from MACKLIN Co., Ltd. All of the reagents were purchased and directly used without further purification.

### **Synthesis of Zn<sub>2</sub>SnO<sub>4</sub>/ZnO catalyst**

In a typical procedure, 0.24 g of NaOH and 0.73 g of CTAB were added into 40 mL of deionized water under sonication treatment. Then, 2 mL of 0.3 M Zn(CH<sub>3</sub>COO)<sub>2</sub> was added dropwise into the solution under vigorous stirring. When the above solution turned into a milky white solution, 16 mg of anhydrous stannous chloride (SnCl<sub>2</sub>) was added to the solution. Whereafter, the mixture was transferred into a stainless-steel autoclave and heated to 150 °C for 16 h. After the reaction was completed, the white products were collected and washed alternately with ethanol and deionized water for 4 times. The final products were vacuum-dried at 60 °C for 4 h and directly used for electrochemical measurements.

### **Synthesis of ZnO catalyst**

The synthetic method of ZnO catalyst is according to a previous study.<sup>19</sup> In detail, 0.24 g of NaOH and 0.73 g of CTAB were added into 40 mL of deionized water under sonication treatment. Then, 2 mL of 0.3 M Zn(CH<sub>3</sub>COO)<sub>2</sub> was added dropwise into the above solution. After that, the solution was transferred into a stainless-steel autoclave

and heated to 150 °C for 16 h. The obtained white products were collected and washed alternately with ethanol and deionized water for 4 times. The final products were vacuum-dried at 60 °C for 4 h and directly used for electrochemical measurements.

### **Synthesis of Zn<sub>2</sub>SnO<sub>4</sub> catalyst**

The synthetic method of Zn<sub>2</sub>SnO<sub>4</sub> was according to a previous report.<sup>20</sup> Firstly, two solutions were prepared: (1) Solution A: 0.53 g of SnCl<sub>4</sub>·5H<sub>2</sub>O was dissolved in 10 mL of deionized water and magnetic stirred for 10 minutes. Then, 10 mL of NaOH aqueous solution with concentration of 1 mol·L<sup>-1</sup> was added to the above solution, resulting in a uniform transparent solution A. (2) Solution B: 0.446 g of Zn(NO<sub>3</sub>)<sub>2</sub>·6H<sub>2</sub>O was dissolved in 10 mL of deionized water. After magnetic stirring for 10 minutes, the obtained solution was marked as B. Afterwards, a uniform milky-white suspension was produced by slowly adding solution B to solution A. The resultant solution was transferred into a stainless-steel autoclave (50 mL) and heated to 220 °C for 3 h. When the reaction was over, the products were collected and washed with ethanol and deionized water for 4 times. Finally, the products were vacuum dried for 6 h.

### **Materials characterization**

The prepared catalysts were systematically characterized in terms of phase, structure, and morphology. X-ray diffraction (XRD) with a model of Bruker D8 Focus Diffraction system using Cu K $\alpha$  radiation was employed to detect the phase of prepared catalysts. A QUATTRA S field-emission scanning electron microscope (FESEM) was used to observe morphology. TEM, HRTEM and elemental mapping were performed

on a jeol2100F transmission electron microscope at an accelerating voltage of 120 kV. X-ray photoelectron spectroscopy (XPS) was conducted on a K-Alpha Analytical instrument and all obtained XPS spectra were calibrated against the C 1s photoelectron signal at 284.6 eV. The X-ray absorption near edge structure (XANES) and extended X-ray absorption fine structure (EXAFS) of Sn K-edge and Zn K-edge were measured at room temperature by the BL10c beam line at the Pohang Light Source (PLS-II), Korea. The gas products were detected by GC 9790 plus gas chromatograph. While the liquid products were quantified by  $^1\text{H}$  NMR spectra that obtained on a Bruker Advance DPS-2400 spectrometer.

### **CO<sub>2</sub>RR performance evaluation**

The electrochemical CO<sub>2</sub> reduction was conducted in a three-chamber flow cell. The anode and cathode was separated by a Nafion 117 membrane. 0.5 M KHCO<sub>3</sub> solution was used as the electrolyte for both anode and cathode. The flow-rate of CO<sub>2</sub> was controlled at 20 sccm by gas mass-flow controller. The Ar (99.999%) was used as the carrier gas. The counter electrode was a piece of Ni foam with an area of  $0.5 \times 2 \text{ cm}^2$ . The electrochemical data were measured using a CHI760E electrochemical workstation. A solid-state Ag/AgCl electrode was used as reference electrode. All the measured data were calibrated relatively to reversible hydrogen electrode (RHE). All potentials were not iR compensated. The sweep speed of Linear sweep voltammetry (LSV) curves was  $5 \text{ mV s}^{-1}$ . The products were measured over a one-hour period and repeated at least three times to obtain the average for each applied potential. The response framework, including the electrolyte, was risen with CO<sub>2</sub> for thirty minutes to

arrive at CO<sub>2</sub> immersion before the electrochemical estimations. A gas chromatography system with flame ionization, thermal conductivity, and multiple in-line gas analyzers was used to qualify the gas products.

The Faradic efficiency of gas products was calculated based on the equation of  $FE = \frac{nFxV}{j}$ , where F is Faraday's constant, n is the electron transfer numbers, V is the total molar flow rate of the gas reactant, x is the mole fraction of the gas product, and j is the total current throughout the CO<sub>2</sub>RR process.

A Bruker 400 MHz NMR spectrometer was used to analyze the CO<sub>2</sub>RR's liquid products. As the internal standard, 400 mL of the sampled catholyte was added to 50 μL of DMSO solution (80 ppm) and 50 μL of D<sub>2</sub>O. The water suppression method was used to measure the <sup>1</sup>H NMR spectrum. The Faradaic efficiency of liquid products was calculated according to the equation of  $FE = \frac{nF}{Q}$ , where Q is the total quantity of electric charge, n is the molecular amount of the product, and F is the Faraday's constant.

### **Preparation of working electrode**

The working electrode was prepared according to the following steps. 1 mg of the catalyst and 10 μL of Nafion solution were uniformly dispersed in 500 μL ethanol by ultrasonic for 30 min to form a homogeneous ink. Then, the catalyst was dropped onto a piece of gas diffusion layer with the coating area of 0.5 × 2 cm<sup>2</sup>. Finally, the gas diffusion layer was dried naturally and used for electrochemical measurements.

The electrochemical impedance spectroscopy measurements covered a frequency range of 0.01 Hz to 100 KHz. Besides, double-layer capacitances (C<sub>dl</sub>) were measured

using cyclic voltammetry (CV) at different scan speeds (40, 60, 80, 100, 120, 150 mV s<sup>-1</sup>) in the potential range of 0.2-0.3 V vs. RHE. Notably, the C<sub>dl</sub> and EIS measurements were using the typical three electrode system with glassy carbon loaded catalyst as working electrode.



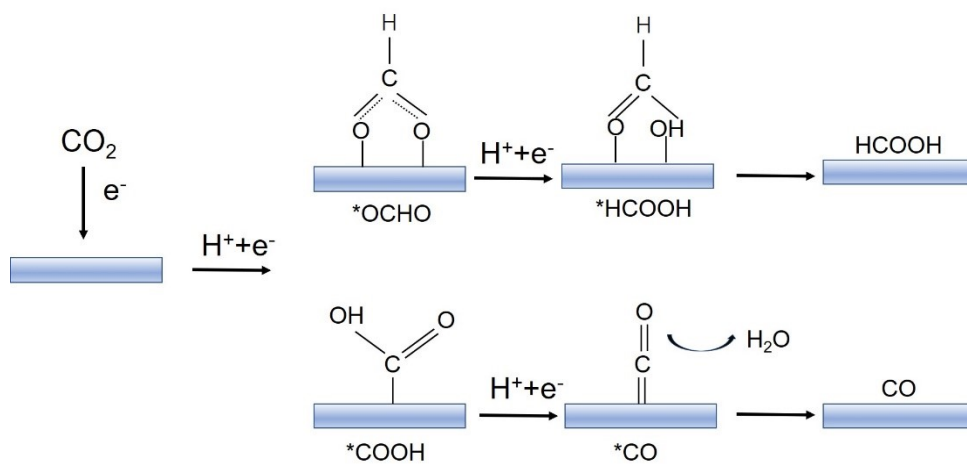

**Figure S1.** Reaction pathways for HCOOH and CO products.

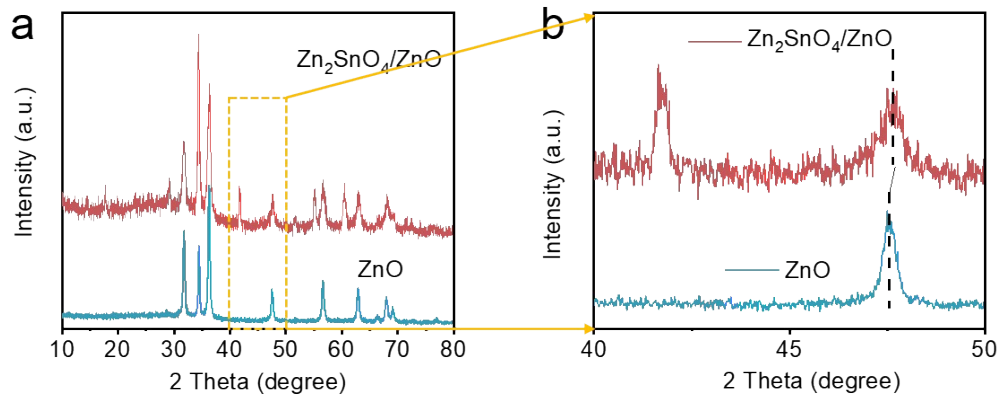

**Figure S2.** a) XRD patterns of ZnO and Zn<sub>2</sub>SnO<sub>4</sub>/ZnO, b) Magnified XRD patterns corresponding to the region in a) marked with yellow rectangle.

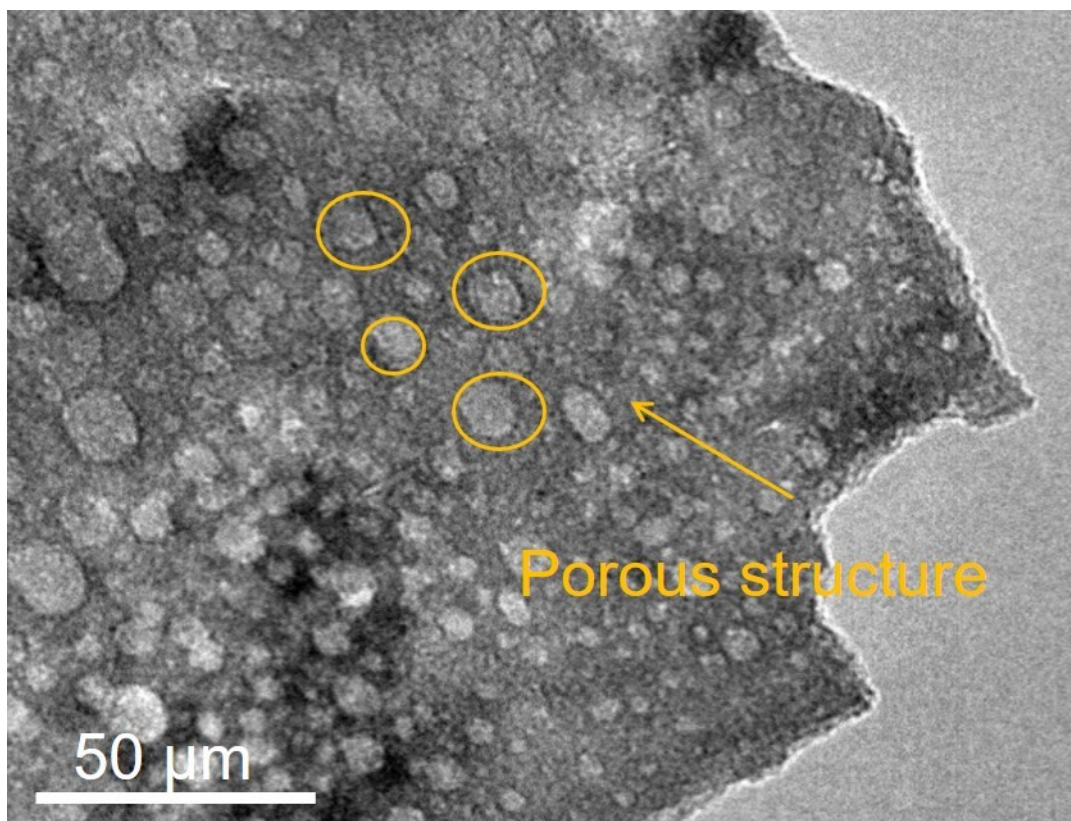

**Figure S3.** The TEM image of ZnO in Zn<sub>2</sub>SnO<sub>4</sub>/ZnO.

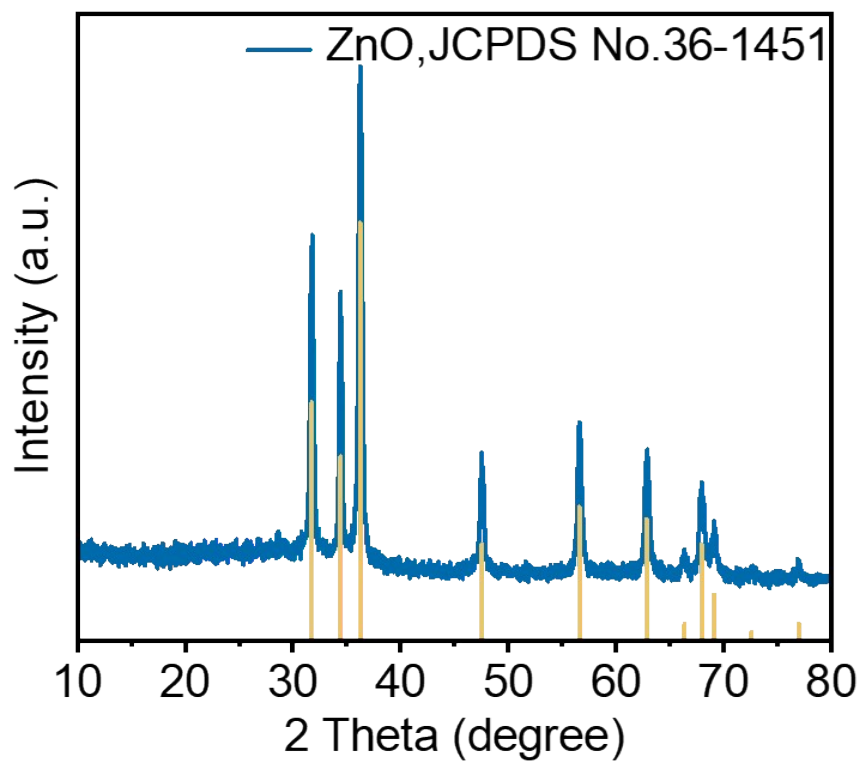

**Figure S4.** XRD pattern of prepared ZnO catalyst.

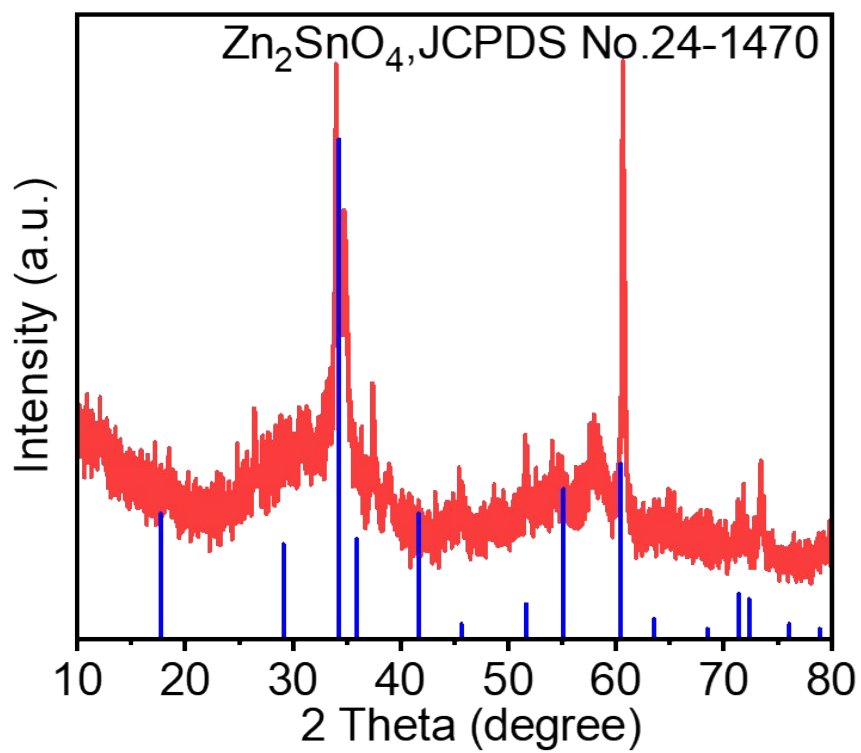

**Figure S5.** XRD pattern of prepared  $Zn_2SnO_4$  catalyst.

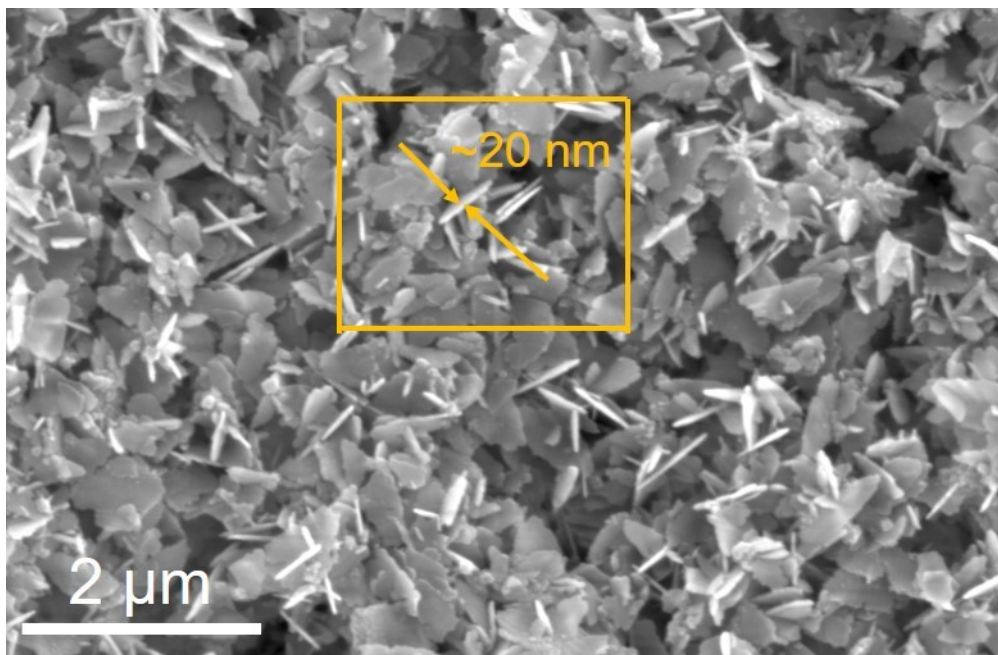

**Figure S6.** SEM image of ZnO.

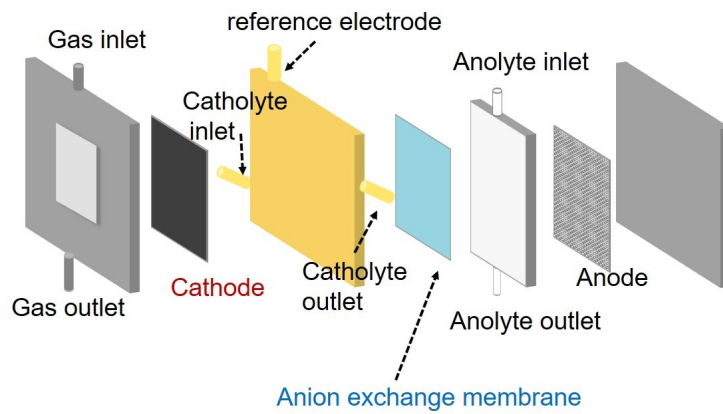

**Figure S7.** Flow-cell schematic diagram.

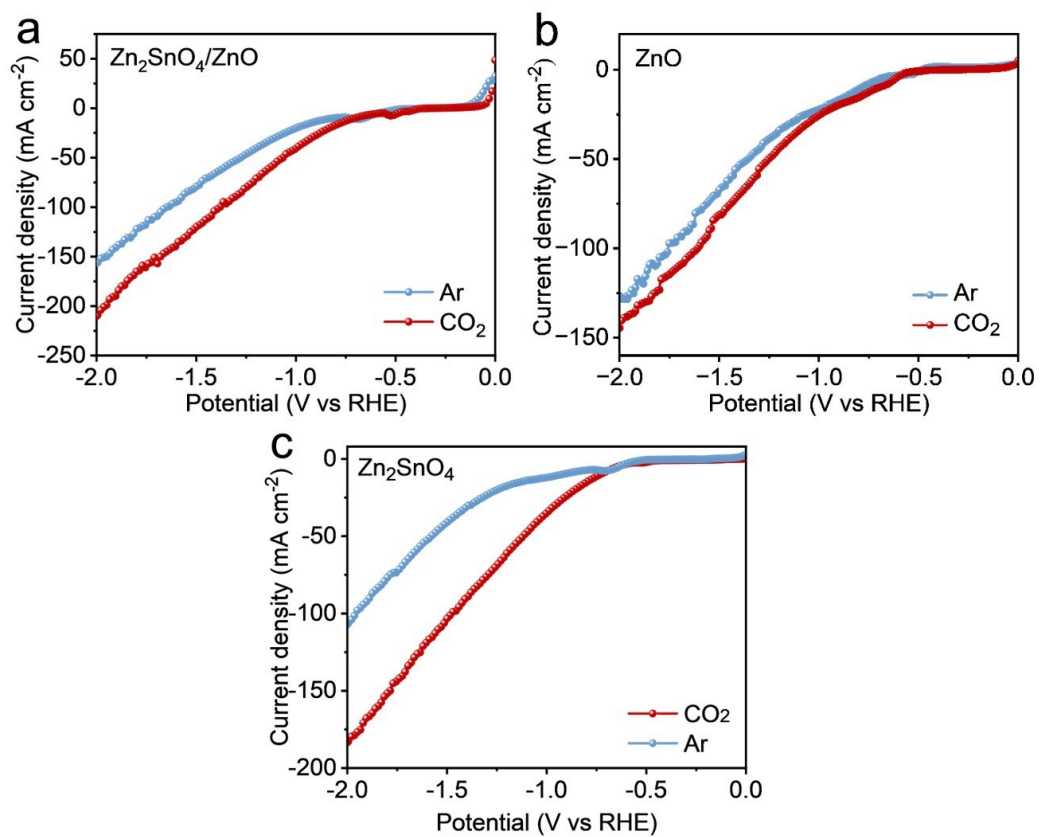

**Figure S8.** LSV curves of a)  $\text{Zn}_2\text{SnO}_4/\text{ZnO}$ , b) Syn.  $\text{ZnO}$ , and c)  $\text{Zn}_2\text{SnO}_4$  measured at a scan rate of  $10 \text{ mA cm}^{-2}$  in Ar- or  $\text{CO}_2$ -saturated  $0.5 \text{ M KHCO}_3$  solution.



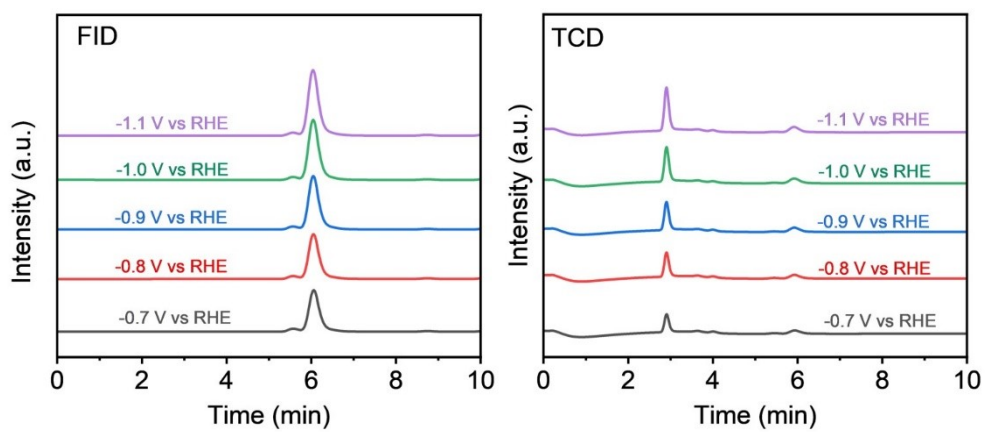

**Figure S9.** Gas-chromatography of gas product produced by  $\text{Zn}_2\text{SnO}_4/\text{ZnO}$  for  $\text{CO}_2\text{RR}$  at various potentials in 0.5 M  $\text{KHCO}_3$  solution: a) FID, b) TCD.

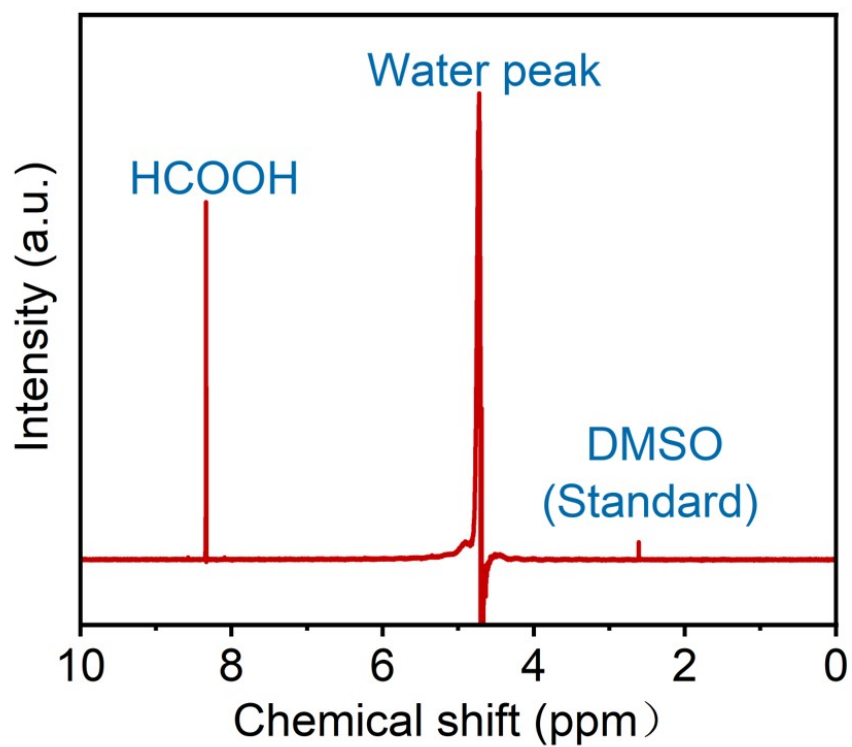

**Figure S10.**  $^1\text{H}$  NMR spectrum of liquid products acquired from  $\text{Zn}_2\text{SnO}_4/\text{ZnO}$  for  $\text{CO}_2\text{RR}$  at  $-1.0$  V vs RHE.

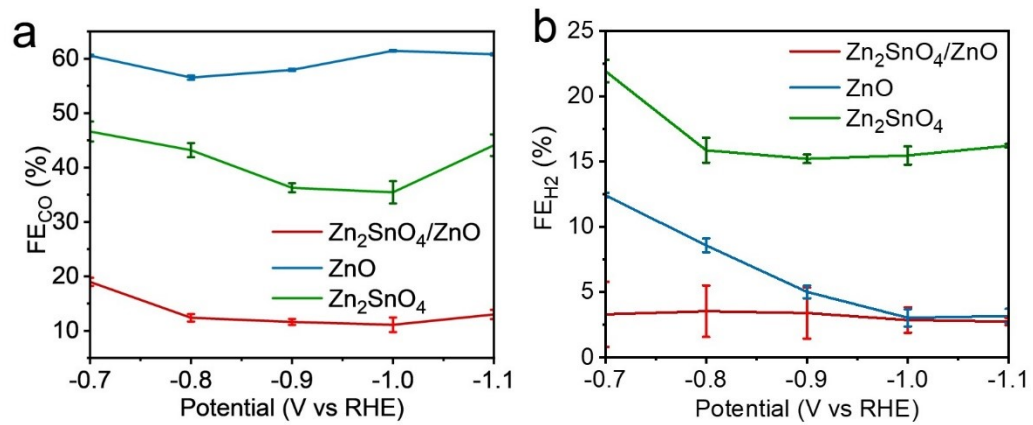

**Figure S11.** FEs of a) CO, b) H<sub>2</sub> for pristine ZnO, Zn<sub>2</sub>SnO<sub>4</sub> and Zn<sub>2</sub>SnO<sub>4</sub>/ZnO.

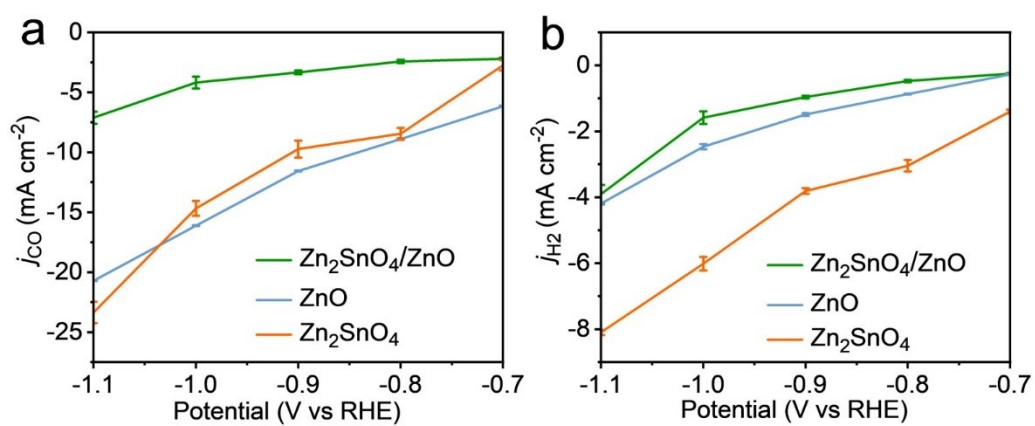

**Figure S12.** Partial current densities of H<sub>2</sub> and CO for Zn<sub>2</sub>SnO<sub>4</sub>/ZnO, Syn. ZnO, and Zn<sub>2</sub>SnO<sub>4</sub>.

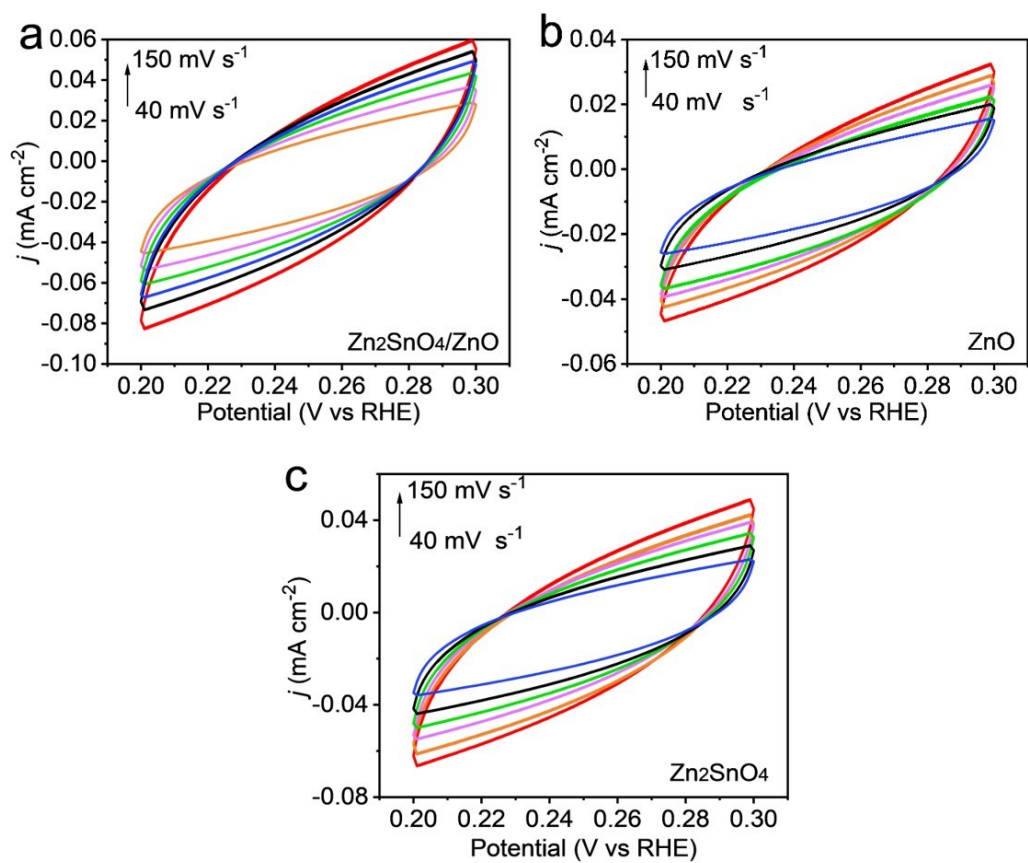

**Figure S13.** Cyclic voltammograms recorded for a)  $\text{Zn}_2\text{SnO}_4/\text{ZnO}$ , b) Syn.  $\text{ZnO}$ , and c)  $\text{Zn}_2\text{SnO}_4$  electrodes in the approximate region of 0.20 – 0.30 V vs. RHE at various scan rates.

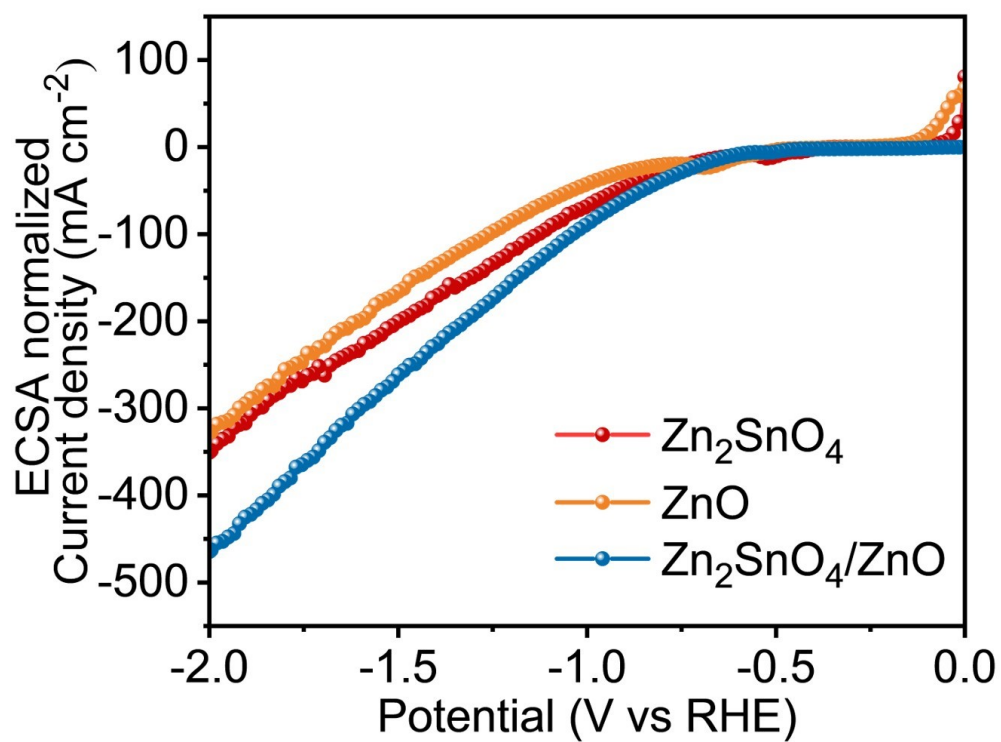

**Figure S14.** The ECSA normalized specific current density of Zn<sub>2</sub>SnO<sub>4</sub>/ZnO, Syn. ZnO, and Zn<sub>2</sub>SnO<sub>4</sub>/ZnO.

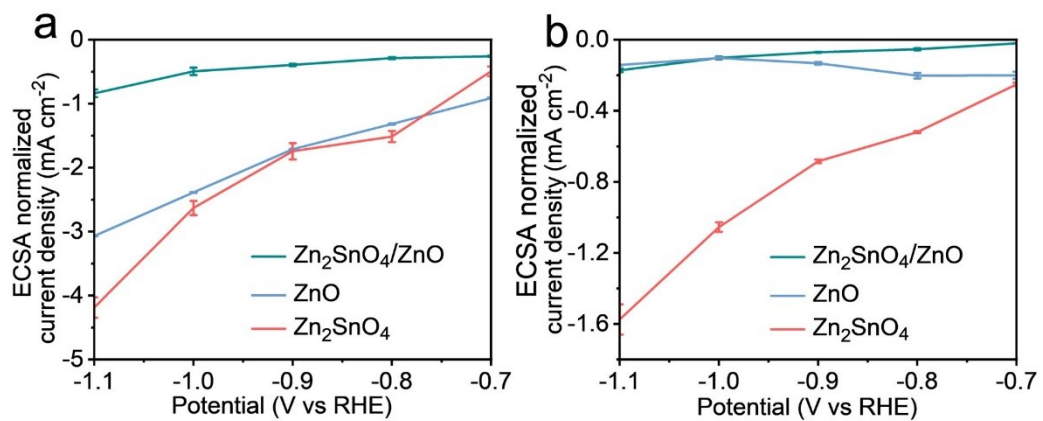

**Figure S15.** ECSA normalized partial current density of a) CO b) H<sub>2</sub> for Zn<sub>2</sub>SnO<sub>4</sub>/ZnO, ZnO, and Zn<sub>2</sub>SnO<sub>4</sub>.
